# Supplementary material for: 17β-Estradiol Induces Mitophagy Upregulation to Protect Chondrocytes via the SIRT1-Mediated AMPK/mTOR Signaling Pathway
Source: PubMed Central journal article supplement (PMC7888342; doi:10.3389/fendo.2020.615250), 2021-02-03
Supplement: DataSheet_1.pdf [file DataSheet_1.pdf]

## Supplementary Material

### Supplementary Figures

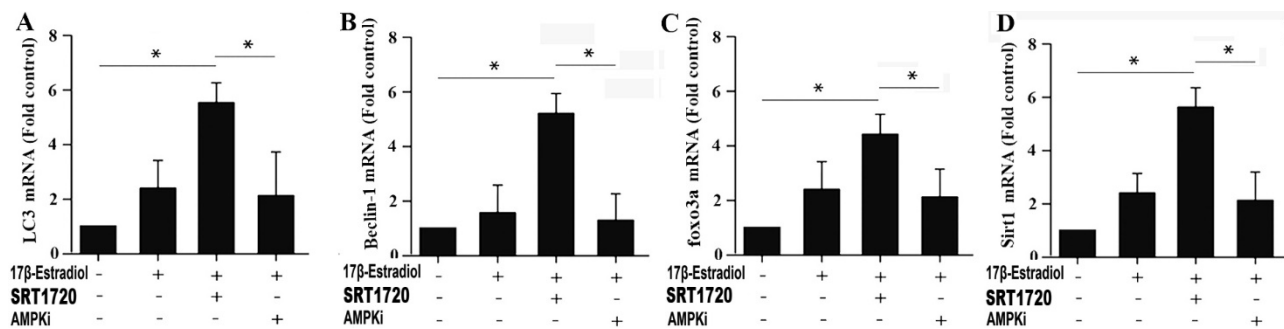

**Supplementary Figure 1** 17β-E2 treatment promoted the mRNA expression level of LC3 (A), Beclin-1 (B), foxo3a (C) and SIRT1 (D) in ATDC5 chondrocytes. The cells were pretreated with SRT1720 (SIRT1 activator) or 20 μM Compound C (AMPK inhibitor), and then incubated with or without  $1 \times 10^{-7}$  M 17β-E2 for 24 h. The mRNA expression level of microtubule-associated protein 1A/1B light chain 3 (LC3), Beclin-1, forkhead box O 3a (foxo3a) and SIRT1 were detected by RT-PCR. GAPDH was used as an internal control to normalize the data. These experiments were independently repeated three times. Data are presented as the mean ± SD. \* $P < 0.05$  versus the control group indicated a significant difference.
